# Supplementary material for: Positive Deviance for Dual-Method Promotion among Women in Uganda: A Qualitative Study
Source: Preprints.org preprint supplement (doi:10.20944/preprints202007.0050.v1), 2020-07-05
Supplement: Supplementary file 3 [file supplementary]

Archive with 12 entries (12 files):
- Table S1-Interview Guide.pdf
- __MACOSX/._Table S1-Interview Guide.pdf
- Table S2-Questionnaire (English).pdf
- __MACOSX/._Table S2-Questionnaire (English).pdf
- Table S3-Questionnaire (Runyankore).pdf
- __MACOSX/._Table S3-Questionnaire (Runyankore).pdf
- Table S4-Consolidated criteria for reporting qualitative studies (COREQ) 32-item checklist.pdf
- __MACOSX/._Table S4-Consolidated criteria for reporting qualitative studies (COREQ) 32-item checklist.pdf
- Table S5-The detailed characteristics of participants included in in-depth interviews.pdf
- __MACOSX/._Table S5-The detailed characteristics of participants included in in-depth interviews.pdf
- Text S6-Barriers to dual-method use which were not directly related to HEC use for women in stable relationships.pdf
- __MACOSX/._Text S6-Barriers to dual-method use which were not directly related to HEC use for women in stable relationships.pdf
