# Supplementary material for: Positive Deviance for Dual-Method Promotion among Women in Uganda: A Qualitative Study
Source: Preprints.org preprint supplement (doi:10.20944/preprints202007.0050.v1), 2020-07-05
Supplement: Supplementary file 3 [file supplementary › Table S4-Consolidated criteria for reporting qualitative studies (COREQ) 32-item checklist.pdf]

**Table S4- Consolidated criteria for reporting qualitative studies (COREQ): 32-item checklist**

**Title:** Positive deviance for dual-method promotion among women in Uganda: A qualitative study

**Authors:** Hodaka Kosugi, Akira Shibamura, Junko Kiriya, Ken Ing Cherng Ong, Stephen Mucunguzi, Conrad Muzoora and Masamine Jimba

(Developed from: Tong A, Sainsbury P, Craig J. Consolidated criteria for reporting qualitative research (COREQ): a 32-item checklist for interviews and focus groups. International Journal for Quality in Health Care. 2007. Volume 19, Number 6: pp. 349 – 357)

| No. Item                                       | Guide questions/description                                                                                                               | Response/Reported on Page #                                                                                                                                                                           |
|------------------------------------------------|-------------------------------------------------------------------------------------------------------------------------------------------|-------------------------------------------------------------------------------------------------------------------------------------------------------------------------------------------------------|
| <b>Domain 1: Research team and reflexivity</b> |                                                                                                                                           |                                                                                                                                                                                                       |
| <i>Personal Characteristics</i>                |                                                                                                                                           |                                                                                                                                                                                                       |
| 1. Interviewer/facilitator                     | Which author/s conducted the interview or focus group?                                                                                    | N/A                                                                                                                                                                                                   |
| 2. Credentials                                 | What were the researcher's credentials? E.g. PhD, MD                                                                                      | HK: MA<br>AS: MA, PhD, Assistant Professor<br>JK: MA, PhD, Assistant Professor<br>KICO: MA, PhD, Assistant Professor<br>SM: MD, MPH<br>CM: MD, Sen. Lecture<br>MJ: MD, MPH, PhD, Professor, and Chair |
| 3. Occupation                                  | What was their occupation at the time of the study?                                                                                       | P.1                                                                                                                                                                                                   |
| 4. Gender                                      | Was the researcher male or female?                                                                                                        | Six males and one female                                                                                                                                                                              |
| 5. Experience and training                     | What experience or training did the researcher have?                                                                                      | All the researchers have done previous several qualitative research projects.                                                                                                                         |
| <i>Relationship with participants</i>          |                                                                                                                                           |                                                                                                                                                                                                       |
| 6. Relationship established                    | Was a relationship established prior to study commencement?                                                                               | See the manuscript in the method section-participant enrolment (P.3-4)                                                                                                                                |
| 7. Participant knowledge of the interviewer    | What did the participants know about the researcher? e.g. personal goals, reasons for doing the research                                  | See the manuscript in the method section-participant enrolment (P.3-4)                                                                                                                                |
| 8. Interviewer characteristics                 | What characteristics were reported about the interviewer/facilitator? e.g. Bias, assumptions, reasons and interests in the research topic | See the manuscript in the method section-participant enrolment (P.3-4)                                                                                                                                |
| <b>Domain 2: study design</b>                  |                                                                                                                                           |                                                                                                                                                                                                       |
| <i>Theoretical framework</i>                   |                                                                                                                                           |                                                                                                                                                                                                       |
| 9. Methodological orientation and Theory       | What methodological orientation was stated to underpin the study? e.g. grounded theory, discourse analysis, ethnography,                  | See the manuscript in the method section/ project                                                                                                                                                     |

|                                        |                                                                                    |                                                                                          |
|----------------------------------------|------------------------------------------------------------------------------------|------------------------------------------------------------------------------------------|
|                                        | phenomenology, content analysis                                                    | overview and study setting (P.3)                                                         |
| <i>Participant selection</i>           |                                                                                    |                                                                                          |
| 10. Sampling                           | How were participants selected? e.g. purposive, convenience, consecutive, snowball | See the manuscript in the method section-participant enrolment (P.3-4)                   |
| 11. Method of approach                 | How were participants approached? e.g. face-to-face, telephone, mail, email        | See the manuscript in the method section-participant enrolment (P.3-4)                   |
| 12. Sample size                        | How many participants were in the study?                                           | See the manuscript in the method section/ study participants (P.3)                       |
| 13. Non-participation                  | How many people refused to participate or dropped out? Reasons?                    | No one has dropped out                                                                   |
| <i>Setting</i>                         |                                                                                    |                                                                                          |
| 14. Setting of data collection         | Where was the data collected? e.g. home, clinic, workplace                         | See the manuscript in the method section-data collection and ethics (P.4)                |
| 15. Presence of non-participants       | Was anyone else present besides the participants and researchers?                  | See the manuscript in the method section-data collection and ethics (P.4)                |
| 16. Description of sample              | What are the important characteristics of the sample? e.g. demographic data, date  | See the manuscript in the result section/participant characteristics (P.5)               |
| <i>Data collection</i>                 |                                                                                    |                                                                                          |
| 17. Interview guide                    | Were questions, prompts, guides provided by the authors? Was it pilot tested?      | See the manuscript in the method section/ data collection (P.4) and supplementary file 1 |
| 18. Repeat interviews                  | Were repeat inter views carried out? If yes, how many?                             | No                                                                                       |
| 19. Audio/visual recording             | Did the research use audio or visual recording to collect the data?                | See the manuscript in the method section/ data collection (P.4)                          |
| 20. Field notes                        | Were field notes made during and/or after the interview or focus group?            | No                                                                                       |
| 21. Duration                           | What was the duration of the interviews or focus group?                            | See the manuscript in the method section/ data collection (P.4)                          |
| 22. Data saturation                    | Was data saturation discussed?                                                     | No                                                                                       |
| 23. Transcripts returned               | Were transcripts returned to participants for comment and/or correction?           | No                                                                                       |
| <b>Domain 3: analysis and findings</b> |                                                                                    |                                                                                          |
| <i>Data analysis</i>                   |                                                                                    |                                                                                          |
| 24. Number of data coders              | How many data coders coded the data?                                               | Two. See the manuscript in the method section/ data analysis (P.4)                       |
| 25. Description of the coding tree     | Did authors provide a description of the coding tree?                              | No                                                                                       |
| 26. Derivation of themes               | Were themes identified in advance or derived from the data?                        | See the manuscript in the method section/ data collection                                |

|                                  |                                                                                                                                 |                                                                              |
|----------------------------------|---------------------------------------------------------------------------------------------------------------------------------|------------------------------------------------------------------------------|
|                                  |                                                                                                                                 | (P.4)                                                                        |
| 27. Software                     | What software, if applicable, was used to manage the data?                                                                      | See the manuscript in the method section/ data analysis (P.4)                |
| 28. Participant checking         | Did participants provide feedback on the findings?                                                                              | No                                                                           |
| <i>Reporting</i>                 |                                                                                                                                 |                                                                              |
| 29. Quotations presented         | Were participant quotations presented to illustrate the themes/findings? Was each quotation identified? e.g. participant number | Yes, the interview guide was pretested with five women purposively selected. |
| 30. Data and findings consistent | Was there consistency between the data presented and the findings?                                                              | Yes. See the manuscript in the results (P.5-11)                              |
| 31. Clarity of major themes      | Were major themes clearly presented in the findings?                                                                            | Yes. See the manuscript in the results (P.5-11)                              |
| 32. Clarity of minor themes      | Is there a description of diverse cases or discussion of minor themes?                                                          | Yes. See the manuscript in the results (P.5-11)                              |
