# Supplementary material for: Positive Deviance for Dual-Method Promotion among Women in Uganda: A Qualitative Study
Source: Preprints.org preprint supplement (doi:10.20944/preprints202007.0050.v1), 2020-07-05
Supplement: Supplementary file 3 [file supplementary › Table S5-The detailed characteristics of participants included in in-depth interviews.pdf]

**Table S5- The detailed characteristics of participants included in in-depth interviews**

| Table 55: The detailed characteristics of participants included in in-depth interviews |    |     |           |                   |                                 |                |          |                      |                |                     |                               |            |                         |            | History of HIV/ST Is |
|----------------------------------------------------------------------------------------|----|-----|-----------|-------------------|---------------------------------|----------------|----------|----------------------|----------------|---------------------|-------------------------------|------------|-------------------------|------------|----------------------|
| Facility                                                                               | ID | Age | Education | Religion          | Occupation                      | Wealth index   | Polygamy | Unintended pregnancy | # of child ren | Pregnancy intention | Partner's Pregnancy intention | HEC type   | Frequency of condom use |            |                      |
| PD                                                                                     | 1  | 22  | 40        | Never             | Muslim                          | Agriculture    | Poorer   | No                   | Yes            | 8                   | No                            | Don't know | Injectables             | Every time | No                   |
|                                                                                        | 2  | 2   | 18        | Never             | Roman catholic                  | Unemployed     | Poorer   | No                   | No             | 1                   | Yes                           | Yes        | Injectables             | Every time | No                   |
|                                                                                        | 2  | 4   | 27        | Never             | Christian Protestant/other      | Own business   | Poorer   | No                   | No             | 2                   | Yes                           | No         | Injectables             | Every time | No                   |
|                                                                                        | 2  | 14  | 25        | Secondary or more | Christian Protestant/other      | Own business   | Richest  | No                   | Yes            | 1                   | Yes                           | Yes        | Injectables             | Every time | No                   |
|                                                                                        | 3  | 24  | 31        | Primary           | Christian                       | Own business   | Richer   | Yes                  | Yes            | 3                   | Yes                           | Yes        | Injectables             | Every time | No                   |
|                                                                                        | 4  | 10  | 27        | Primary           | Roman catholic                  | Own business   | Richest  | No                   | No             | 3                   | Yes                           | Yes        | OCPs                    | Every time | Yes                  |
|                                                                                        | 5  | 4   | 22        | Primary           | Roman catholic                  | Private sector | Poorest  | No                   | No             | 1                   | Yes                           | Yes        | Implants                | Every time | No                   |
|                                                                                        | 5  | 21  | 21        | Primary           | Muslim                          | Unemployed     | Poorest  | No                   | No             | 1                   | Yes                           | Yes        | Injectables             | Every time | No                   |
| Non-PD                                                                                 | 1  | 7   | 28        | Primary           | Roman catholic Protestant/other | Agriculture    | Middle   | No                   | Yes            | 3                   | Yes                           | Yes        | Injectables             | Never      | No                   |
|                                                                                        | 1  | 25  | 36        | Primary           | Christian                       | Own business   | Poorest  | No                   | Yes            | 5                   | Undecided                     | Don't know | Injectables             | Never      | No                   |
|                                                                                        | 2  | 21  | 23        | Never             | Muslim Protestant/other         | Unemployed     | Poorest  | No                   | No             | 2                   | Undecided                     | Don't know | Implants                | Never      | No                   |
|                                                                                        | 2  | 29  | 27        | Primary           | Christian                       | Agriculture    | Richer   | No                   | No             | 2                   | Yes                           | Don't know | Injectables             | Never      | Yes                  |
|                                                                                        | 3  | 19  | 38        | Primary           | Roman catholic Protestant/other | Own business   | Richer   | No                   | Yes            | 5                   | No                            | No         | Injectables             | Never      | Yes                  |
|                                                                                        | 3  | 28  | 27        | Primary           | Christian Protestant/other      | Own business   | Richer   | Yes                  | Yes            | 2                   | No                            | Don't know | Implants                | Never      | Yes                  |
|                                                                                        | 4  | 6   | 34        | Primary           | Christian Protestant/other      | Own business   | Middle   | No                   | No             | 2                   | No                            | No         | Injectables             | Never      | No                   |
|                                                                                        | 4  | 30  | 27        | Primary           | Christian Protestant/other      | Own business   | Richest  | No                   | No             | 1                   | Yes                           | Yes        | Implants                | Never      | Yes                  |
|                                                                                        | 5  | 8   | 29        | Primary           | Christian Protestant/other      | Own business   | Poorest  | No                   | No             | 3                   | Yes                           | Yes        | Injectables             | Never      | Yes                  |
|                                                                                        | 5  | 17  | 24        | Primary           | Christian                       | Private sector | Poorest  | Yes                  | No             | 1                   | Yes                           | Yes        | Injectables             | Never      | No                   |

PDs: Positive Deviants; HIV: Human Immunodeficiency Virus; STIs; sexually transmitted infections; HECs: Highly Effective Contraceptives; IUD: Intrauterine Device; OCPs: oral contraceptive pills.
